Original Article

# Atorvastatin protects cardiomyocytes from oxidative stress by inhibiting LOX-1 expression and cardiomyocyte apoptosis

Lei Zhang<sup>1,†,\*</sup>, Linfang Cheng<sup>2,†</sup>, Qiqi Wang<sup>1</sup>, Dongchen Zhou<sup>1</sup>, Zhigang Wu<sup>2</sup>, Ling Shen<sup>2</sup>, Li Zhang<sup>1</sup>, and Jianhua Zhu<sup>1</sup>

<sup>1</sup>Department of Cardiology, The First Affiliated Hospital of Zhejiang University School of Medicine, Hangzhou 31003, China, and <sup>2</sup>State Key Laboratory for Diagnosis and Treatment of Infectious Diseases, Zhejiang University School of Medicine, Hangzhou 31003, China

<sup>†</sup>These authors contributed equally to this work.

\*Correspondence address. Tel: +86-571-87236700; Fax: +86-571-87236707; E-mail: lzhang2000@yahoo.com

Received 23 September 2014; Accepted 18 December 2014

## Abstract

Coronary artery disease (CAD) is a major health problem worldwide. The most severe form of CAD is acute coronary syndrome (ACS). Recent studies have demonstrated the beneficial role of atorvastatin in ACS; however, the mechanisms underlying this effect have not been fully clarified. Growing evidence indicates that activation of the lectin-like oxidized low-density lipoprotein receptor-1 (LOX-1) plays an important role in oxidative stress-induced cardiomyocyte apoptosis during ACS. In this study, we examined whether atorvastatin inhibits H<sub>2</sub>O<sub>2</sub>-induced LOX-1 expression and H9c2 cardiomyocyte apoptosis, and investigated the underlying signaling pathway. Treatment of H9c2 cardiomyocytes with H<sub>2</sub>O<sub>2</sub> resulted in elevated expression of LOX-1 mRNA and protein, as well as increased caspase-3 and -9 protein expression and cell apoptosis. H<sub>2</sub>O<sub>2</sub>-induced LOX-1 expression, caspase protein expression, and cardiomyocyte apoptosis were attenuated by pretreatment with atorvastatin. Atorvastatin activated H<sub>2</sub>O<sub>2</sub>-inhibited phosphorylation of Akt in a concentration-dependent manner. The Akt inhibitor, LY294002, inhibited the effect of atorvastatin on inducing Akt phosphorylation and on suppressing H<sub>2</sub>O<sub>2</sub>-mediated caspase up-regulation and cell apoptosis. These findings indicate that atorvastatin protects cardiomyocyte from oxidative stress via inhibition of LOX-1 expression and apoptosis, and that activation of H<sub>2</sub>O<sub>2</sub>-inhibited phosphorylation of Akt may play an important role in the protective function of atorvastatin.

**Key words:** atorvastatin, H<sub>2</sub>O<sub>2</sub>, lectin-like oxidized low-density lipoprotein receptor-1, cardiomyocyte, apoptosis, Akt

## Introduction

Coronary artery disease (CAD) is a major health problem worldwide. The most severe form of CAD is acute coronary syndrome [ACS; i.e. myocardial infarction (MI) or unstable angina]. ACS refers to any group of symptoms attributed to the obstruction of coronary arteries which is an immediate threat of life and the leading cause of mortality. Although numerous mechanisms contribute to the pathogenesis of ACS, there is clear evidence in the literature indicating that increased

production of reactive oxygen species (ROS), such as H<sub>2</sub>O<sub>2</sub>, leads to the development and progression of cardiomyocyte apoptosis, which plays a pivotal role in the pathogenesis of ischemic-reperfusion injury during ACS [1,2]. Adult cardiomyocytes are terminally differentiated cells that lack the ability to divide and/or proliferate, and accordingly it is important to protect cardiomyocytes through suppression of ROS-induced apoptosis during ACS.

Lectin-like oxidized low-density lipoprotein receptor-1 (LOX-1) is a type II membrane protein of the C-type lectin family. It recognizes multiple classes of ligands, such as oxidized low-density lipoprotein (ox-LDL), acetylated LDL, platelets, apoptotic/aged cells, and bacteria [3]. LOX-1 is expressed in endothelial cells (ECs), macrophages, vascular smooth muscle cells (VSMCs), platelets, and cardiomyocytes and has been demonstrated to actively contribute to all stages of atherogenesis [4]. Recent evidence has indicated that LOX-1 plays an important role in apoptosis. In human and experimental atherosclerotic lesions, LOX-1 expression has been observed in apoptotic cells [5], and LOX-1 plays an important role in ox-LDL-induced apoptosis, both in artery ECs [6] and in VSMCs [7]. Inhibition of LOX-1 expression by an antisense oligonucleotide significantly decreased ox-LDL-induced apoptosis of human coronary artery ECs by 75% [6]. Furthermore, release of ROS activates LOX-1 and induces apoptosis in cardiomyocytes [8], and experiments using the LOX-1 receptor antagonist k-carrageenan have indicated that the increase in cardiomyocyte apoptosis is specifically mediated through the activation of LOX-1-dependent pathway [9]. *In vivo* studies have shown that LOX-1 up-regulation or activation promotes cardiomyocyte apoptosis in rat hearts subject to ischemia-reperfusion injury. In addition, LOX-1 inhibition or deletion can reduce cardiomyocyte apoptosis and infarct size both in MI and in ischemia-reperfusion injury experimental models [10–12]. The Akt signaling pathway plays key roles in the pathogenesis of various processes in the heart [13,14]. There is strong evidence suggesting that short-term activation of Akt has beneficial effects via the inhibition of apoptotic cell death [14]. Moreover, Akt plays a modulatory role in LOX-1 synthesis. Blocking Akt phosphorylation increases LOX-1 expression and activation of LOX-1 attenuates Akt phosphorylation [15].

In the past decade, extensive clinical use of 3-hydroxy-3-methylglutaryl-coenzyme A reductase inhibitors, or statins, for their cholesterol-lowering properties, has improved morbidity and mortality in patients with CAD. Studies indicated the multiple effects of atorvastatin, a member of the statin family, in atherosclerosis. Atorvastatin decreased LOX-1 expression and ox-LDL uptake in human coronary artery ECs [16], attenuated DC maturation, and reduced the inflammatory and oxidative stress responses [17]. Moreover, evidence obtained from the MIRACL [18], PROVE-IT [19], and IDEAL-ACS [20] studies has indicated that atorvastatin causes a significant reduction in recurrent ischemia and death or major cardiovascular events in patients with ACS. Current guidelines recommend initiating statin therapy before discharge, regardless of the baseline LDL level in patients with ACS [21]. However, the molecular mechanism of statins in myocardial protection during ACS has not been fully clarified. In this study, we investigated the effect of atorvastatin on H<sub>2</sub>O<sub>2</sub>-induced LOX-1 expression and apoptosis in H9c2 cardiomyocytes, and sought to clarify the identity of the Akt signaling pathway involved.

## Materials and Methods

### Materials

The rat cardiomyoblast cell line H9c2 was obtained from the Cell Bank of the Chinese Academy of Sciences (Shanghai, China). H<sub>2</sub>O<sub>2</sub> was purchased from Sigma (St Louis, USA) and prepared as a 600 μM solution in phosphate-buffered saline (PBS) immediately before use. Atorvastatin (Lipitor; Pfizer Pharmaceuticals, New York, USA) was dissolved in dimethylsulfoxide (DMSO). After storage at –30°C, the stock solution (100 mM) was diluted to 0.1, 1, and 10 μM, respectively. The CellTiter 96 Aqueous cell viability assay kit (MTS) was purchased from Promega (Madison, USA). The

Annexin V/fluorescein isothiocyanate (FITC) kit was purchased from Bender MedSystems GmbH (Vienna, Austria). Antibodies against Akt [Phospho-Akt (Ser473)(D9E) XP Rabbit mAb #4060 and Akt (pan)(C67E7) Rabbit mAb #4691], anti-cleaved caspase-3, and anti-cleaved caspase-9 antibodies used for western blot analysis and the PI3K/Akt inhibitor, LY294002 (50 mM in DMSO), were obtained from Cell Signaling Technology Inc. (Beverly, USA). The anti-LOX-1 antibody was obtained from Abcam (Cambridge, UK).

### Cell culture and treatment

H9c2 cells were cultured in Dulbecco's modified Eagle's medium supplemented with 10% fetal bovine serum in a humidified incubator at 37°C with 5% CO<sub>2</sub> atmosphere. To examine the effect of atorvastatin, H9c2 cells were pretreated with atorvastatin at different concentrations (0, 0.1, 1, and 10 μM) for 3 h, and then incubated with 600 μM H<sub>2</sub>O<sub>2</sub> or vehicle control for 24 h. In the other group, H9c2 cells were pretreated with the Akt inhibitor, LY-294002 (10 μM), for 30 min before incubation with H<sub>2</sub>O<sub>2</sub> for 24 h. The cells were then processed in accordance with each assay. In addition, morphologic changes of treated H9c2 cells were monitored.

### Cell viability assay

Cell viability was measured using CellTiter 96 Aqueous cell viability assay kit (MTS). Cells were seeded into 96-well plates at a density of 1 × 10<sup>4</sup> cells/well and allowed to attach overnight. After the indicated treatment, the assay was performed according to the manufacturer's instructions. In brief, 20 μl of MTS/PMIS mixture was added into each well. Plates were incubated at 37°C for 1 h, and the absorbance at 490 nm was measured. Background absorbance was subtracted according to the readings from blank controls. Treatments were performed in triplicate and the results were expressed as the average percentage of total cell number.

### Hoechst 33342/PI double staining

Morphological changes of the nuclei were observed by Hoechst 33342/PI staining. In brief, cultures were incubated with Hoechst 33342 (5 μg/ml; Invitrogen, Carlsbad, USA) for 15 min at 37°C, followed by propidium iodide (PI; 15 μg/ml; Invitrogen) for 10 min at 4°C. After extensive washing, Hoechst/PI-stained cells were examined under an inverted fluorescent microscope IX81 (Olympus, Tokyo, Japan) equipped with epifluorescence illumination.

### Flow cytometry analysis

To quantify apoptotic cells, flow cytometry was used after Annexin V binding and PI staining. After treatment as indicated, the cells were washed with ice-cold PBS, and stained with FITC-coupled Annexin V protein and PI for another 20 min. Flow cytometry was performed with a 488-nm laser coupled to a cell sorter (FacsCalibur; BD Biosciences, San Jose, USA). Cells stained with Annexin V alone were considered early apoptotic, and cells stained with both PI and Annexin V were considered late apoptotic.

### Western blot analysis

After treatment, the cultured cells were washed with cold PBS and then lysed in a buffer containing 50 mM Tris–HCl, pH 7.5, 150 mM NaCl, 1 mM Na<sub>2</sub>EDTA, 1% Triton-X 100, 2.5 mM sodium pyrophosphate, 1 mM β-glycerophosphate, 1 mM Na<sub>3</sub>VO<sub>4</sub>, 1 mM NaF, 1 μg/ml leupeptin, and 1 mM phenylmethanesulfonyl fluoride. Protein concentration was quantified using a BCA protein assay kit. Proteins (50 μg)

lane) were separated by 10% sodium dodecyl sulfate–polyacrylamide gel electrophoresis and transferred onto a polyvinylidene difluoride membrane (Millipore, Milford, USA). Membranes were blocked in blocking buffer (PBS with 7.5% non-fat dry milk, 2% BSA, and 0.1% Tween-20) for 1 h and incubated with primary antibodies (1 : 1000) overnight at 4°C. Membranes were washed subsequently in Tris-buffered saline with 0.1% Tween-20 washing buffer and incubated with horseradish peroxidase-conjugated secondary antibodies at room temperature for 1 h. Membranes were then detected by enhanced chemiluminescence detection reagents.

### Quantitative RT-PCR

Quantitative RT-PCR was performed by LightCycler Technology (Roche Molecular Biochemicals, Mannheim, Germany) using SYBR Green I detection reagents. In all assays, cDNA was amplified in a standard program (10 s denaturing step; 55 cycles of 5 s at 95°C, 15 s at 65°C, and 15 s at 72°C; melting point analysis in 0.1°C steps; final cooling step). Each LightCycler capillary was loaded with 1.5 µl of DNA Master Mix, 1.8 µl of MgCl<sub>2</sub> (25 mM), 10.1 µl of H<sub>2</sub>O, and 0.4 µl of each primer (10 µM). The final amount of cDNA per reaction was reversely transcribed from 2 ng RNA. Relative quantification of target genes was performed using a mathematical model recommended by Roche Molecular Biochemicals. The following primers were used: LOX-1\_f (5'-gtggaggagctcttcaggga-3') and LOX-1\_r (5'-aggcaccagggtgatgcaa-3'). The primers used for the housekeeping gene, which was used for normalization, were as follows: GAPDH\_f (5'-accacgtccatgccatcac-3') and GAPDH\_r (5'-tccaccacctgttgctgta-3').

### Statistical analysis

All experiments were repeated three times. The results were expressed as the mean ± SD. Statistical significance was analyzed by one-way analysis of variance. A *P*-value of <0.05 was considered statistically significant.

## Results

### Atorvastatin inhibits H<sub>2</sub>O<sub>2</sub>-induced morphology and viability changes in H9c2 cells

Morphological observations were carried out during the experiments. H9c2 cells were treated with H<sub>2</sub>O<sub>2</sub> (600 µM) in the presence or absence of 0.1, 1, and 10 µM atorvastatin, or with 10 µM atorvastatin only for 24 h. After H<sub>2</sub>O<sub>2</sub> treatment, a large fraction of cells exhibited apoptosis-like changes, such as detachment and cytoplasmic shrinkage leading to rounding. However, the proportion of cells with abnormal morphology decreased with increasing atorvastatin dosage, indicating a dose-dependent preventive effect (Fig. 1A). Cell viability was measured using CellTiter 96 Aqueous cell viability assay kit (MTS). H<sub>2</sub>O<sub>2</sub> treatment significantly decreased the viability of H9c2 cells. However, in the presence of different doses of atorvastatin, the induction of cell death was blocked in a dose-dependent manner (Fig. 1B).

### Atorvastatin blocks H<sub>2</sub>O<sub>2</sub>-induced H9c2 cell apoptosis

The anti-apoptotic effects of atorvastatin were detected by both Hoechst 33342/PI staining and flow cytometry analysis. Morphological changes in the nuclei were observed by Hoechst 33342/PI staining in H9c2 cells (Fig. 2). Treatment with H<sub>2</sub>O<sub>2</sub> increased the number of apoptotic cells with nuclear condensation, and the addition of atorvastatin (0.1–10 µM) reduced the number of apoptotic cells induced by

H<sub>2</sub>O<sub>2</sub> in a concentration-dependent manner. Cells treated with atorvastatin alone displayed nuclei with normal morphology. In addition, to obtain a definitive quantification of the effect of atorvastatin on H<sub>2</sub>O<sub>2</sub>-induced H9c2 cell apoptosis, the percentage of apoptotic cells was determined by flow cytometry analysis. As shown in Fig. 3, after 24 h of H<sub>2</sub>O<sub>2</sub> (600 µM) treatment, the apoptosis index of H9c2 cells was markedly increased compared with that of control group (*P* < 0.01). Interestingly, pretreatment with atorvastatin for 3 h at different concentrations (0.1, 1, and 10 µM) significantly decreased the apoptosis index compared with the H<sub>2</sub>O<sub>2</sub>-treated group (*P* < 0.01). These results demonstrated that H<sub>2</sub>O<sub>2</sub> treatment significantly increased H9c2 cell apoptosis, in the presence of different doses of atorvastatin, and apoptosis was significantly blocked in a dose-dependent manner.

### Atorvastatin suppresses H<sub>2</sub>O<sub>2</sub> induction of LOX-1 mRNA and protein levels in H9c2 cells

Recent studies have indicated that the activation of LOX-1 by oxidative stress plays an important role in cardiomyocyte apoptosis [9]. Hence, we examined the expression of LOX-1 at the mRNA and protein levels by RT-PCR and western blot analysis, respectively. Treatment of H9c2 cells with H<sub>2</sub>O<sub>2</sub> for 24 h resulted in increased levels of LOX-1 mRNA and protein, while pretreatment of cells with atorvastatin markedly suppressed this effect in a dose-dependent manner (Fig. 4).

### Atorvastatin activates H<sub>2</sub>O<sub>2</sub>-suppressed phosphorylation of Akt in H9c2 cells

Akt has been found to modulate LOX-1 synthesis [22]. To gain further insight into the potential molecular mechanisms involved in the above-mentioned experiments, the effect of H<sub>2</sub>O<sub>2</sub> and/or atorvastatin treatment on the Akt pathway was examined. Western blot analysis indicated that H<sub>2</sub>O<sub>2</sub> treatment resulted in a decrease in the phosphorylated forms of Akt compared with non-H<sub>2</sub>O<sub>2</sub>-treated cells, and atorvastatin reversed this effect in a dose-dependent manner. Total amounts of Akt protein were not influenced by individual or combined treatment with H<sub>2</sub>O<sub>2</sub> and atorvastatin (Fig. 5A). The effect of LY-294002 (10 µM), on Akt phosphorylation was also investigated. Western blot analysis indicated that the ability of atorvastatin to activate phosphorylation of Akt was abolished by LY294002 (Fig. 5B).

### Atorvastatin suppresses H<sub>2</sub>O<sub>2</sub>-induced caspase-3 and caspase-9 up-regulation and apoptosis through activating the Akt signal pathway

Caspase-3 and caspase-9 are important molecules in the apoptosis pathway, and their expression is positively correlated with cell apoptosis. The expression levels of caspase-3 and caspase-9 were examined by western blot analysis. Our results showed that H<sub>2</sub>O<sub>2</sub> (600 µM) significantly increased caspase-3 and caspase-9 expression, whereas the addition of 10 µM atorvastatin to the culture system significantly suppressed H<sub>2</sub>O<sub>2</sub>-induced caspase-3 and -9 expression. To determine whether the Akt signal pathway activation was responsible for the protective effect of atorvastatin, the effect of blocking the Akt pathway was observed. In the presence of LY294002 (10 µM), the suppressive effects of atorvastatin on H<sub>2</sub>O<sub>2</sub>-induced caspase up-regulation were significantly reversed (Fig. 6). Flow cytometry analysis also showed that atorvastatin significantly decreased the percentage of H<sub>2</sub>O<sub>2</sub>-induced apoptotic H9c2 cells. Pretreatment with LY294002 reduced the protective effect of atorvastatin against H<sub>2</sub>O<sub>2</sub>-induced apoptosis in

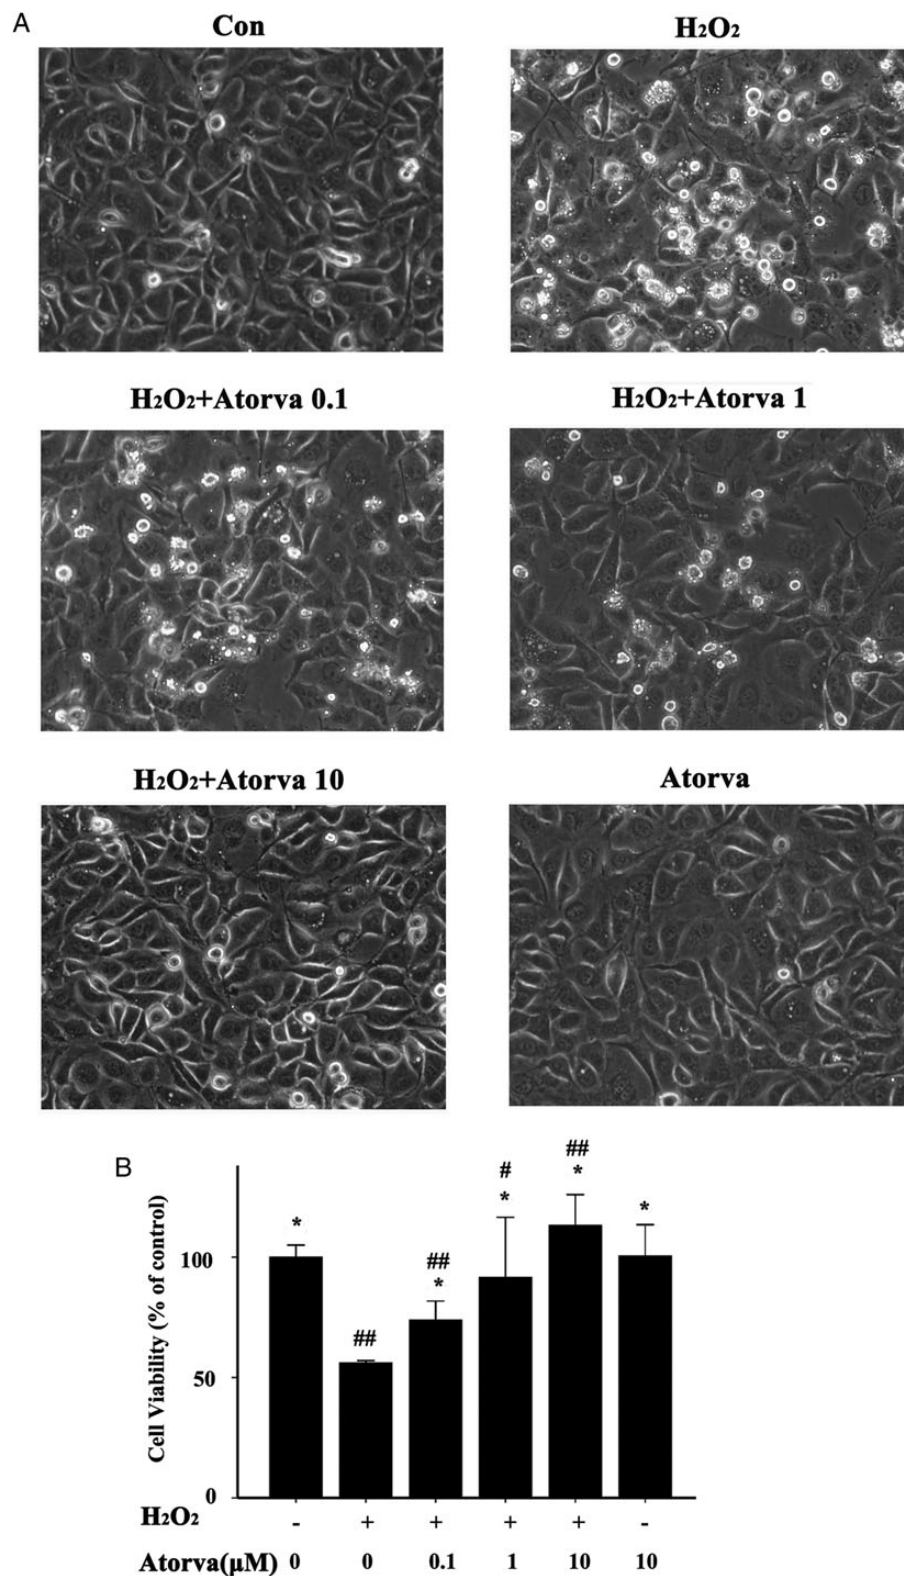

**Figure 1. Atorvastatin inhibits changes of cell morphology and viability induced by H<sub>2</sub>O<sub>2</sub> in H9c2 cells** (A) Treated with H<sub>2</sub>O<sub>2</sub> (600 μM) for 24 h, a large fraction of H9c2 cells exhibited apoptosis-like changes such as detachment and cytoplasmic shrinkage leading to rounding. The proportion of cells with abnormal morphology induced by H<sub>2</sub>O<sub>2</sub> decreased in parallel with the concentration of atorvastatin. Con: vehicle-treated cells, H<sub>2</sub>O<sub>2</sub>: H<sub>2</sub>O<sub>2</sub> (600 μM) alone, H<sub>2</sub>O<sub>2</sub>+Atorva 0.1: H<sub>2</sub>O<sub>2</sub>+atorvastatin (0.1 μM), H<sub>2</sub>O<sub>2</sub>+Atorva 1: H<sub>2</sub>O<sub>2</sub>+atorvastatin (1 μM), H<sub>2</sub>O<sub>2</sub>+Atorva 10: H<sub>2</sub>O<sub>2</sub>+atorvastatin (10 μM), and Atorva: atorvastatin (10 μM) alone. Magnification: ×10. (B) Cell viability was measured using CellTiter 96 Aqueous cell viability assay kit (MTS). H<sub>2</sub>O<sub>2</sub> treatment significantly decreased the viability of H9c2 cells. In the presence of different doses of atorvastatin, the induction of cell death was blocked in a dose-dependent manner (5 × 10<sup>4</sup>/well). Data are presented as the mean ± SD of three independent experiments. <sup>#</sup>*P* < 0.05 and <sup>##</sup>*P* < 0.01 compared with normal control; \**P* < 0.01 compared with H<sub>2</sub>O<sub>2</sub> treatment alone.

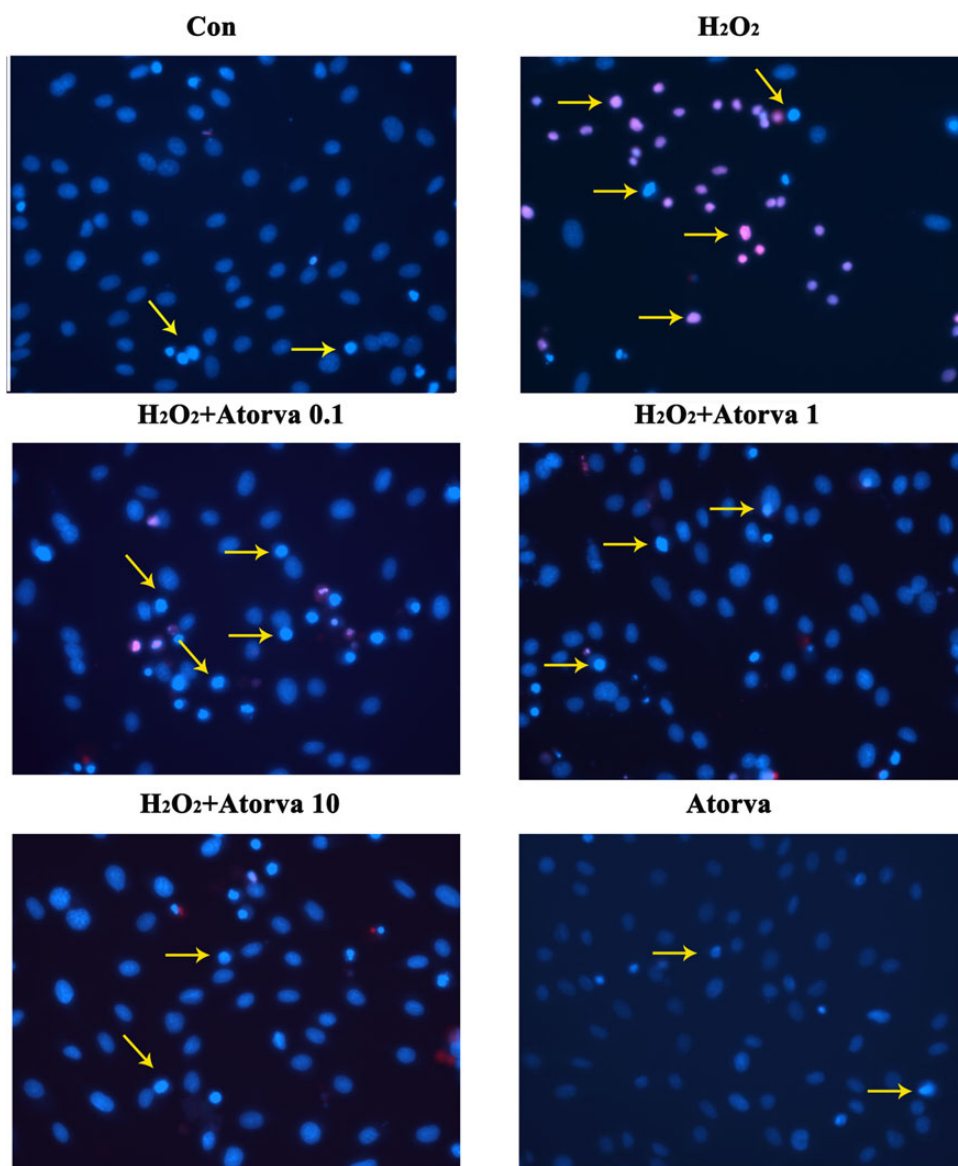

**Figure 2. Atorvastatin blocks H<sub>2</sub>O<sub>2</sub>-induced morphological changes in the H9c2 cell nuclei observed by Hoechst 33342/PI staining** Vehicle-treated cells displayed nuclei with normal morphology. Apoptotic cells are characterized by nuclear condensation and stained color as indicated. Treatment with H<sub>2</sub>O<sub>2</sub> increased the number of apoptotic cells, and the addition of atorvastatin reduced the number of apoptotic cells induced by H<sub>2</sub>O<sub>2</sub> in a concentration-dependent manner. Cells treated with atorvastatin alone displayed nuclei with normal morphology. Con: vehicle-treated cells; H<sub>2</sub>O<sub>2</sub>: H<sub>2</sub>O<sub>2</sub> (600 μM) alone, H<sub>2</sub>O<sub>2</sub>+Atorva 0.1: H<sub>2</sub>O<sub>2</sub> + atorvastatin (0.1 μM), H<sub>2</sub>O<sub>2</sub>+Atorva 1: H<sub>2</sub>O<sub>2</sub> + atorvastatin (1 μM), H<sub>2</sub>O<sub>2</sub>+Atorva 10: H<sub>2</sub>O<sub>2</sub> + atorvastatin (10 μM), and Atorva: atorvastatin (10 μM) alone.

H9c2 cells (Fig. 7). Therefore, the Akt signaling pathway is involved in the anti-apoptotic effect of atorvastatin.

## Discussion

This study shows the protective effects of atorvastatin on H<sub>2</sub>O<sub>2</sub>-induced LOX-1 expression and cell apoptosis via the Akt pathway in H9c2 cardiomyocytes. The cardiomyoblast cell line H9c2, derived from embryonic rat heart, possesses many characteristics of cardiomyocytes and is one of the most appropriate *in vitro* cardiomyocyte models [23]. Our results indicated that H<sub>2</sub>O<sub>2</sub> up-regulates the expression of LOX-1, caspase-3, and caspase-9 and induces apoptosis of H9c2 cardiomyocytes. Atorvastatin inhibits H<sub>2</sub>O<sub>2</sub>-mediated LOX-1 expression, caspase up-regulation and apoptosis in H9c2 cardiomyocytes. Mechanistically, we have shown

that atorvastatin activates H<sub>2</sub>O<sub>2</sub>-suppressed phosphorylation of Akt. The ability of atorvastatin to induce Akt phosphorylation and anti-apoptosis is abolished by LY294002. Our findings support the hypothesis that inhibition of LOX-1 expression in H9c2 cardiomyocytes via the Akt pathway plays an important role in the protective effects of atorvastatin against oxidative stress-induced cardiomyocyte apoptosis. Our results also support the cardioprotective advantage of atorvastatin in human and animal models.

Accelerated cardiomyocyte apoptosis has been shown to play a pivotal role in the pathogenesis of ischemic injury and reperfusion injury during ACS [2]. Recent studies have indicated that the activation of LOX-1 by oxidative stress plays an important role in cardiomyocyte apoptosis [9]. LOX-1 inhibition or deletion can significantly reduce cardiomyocyte apoptosis [10,11]. Moreover, LOX-1 activation can induce

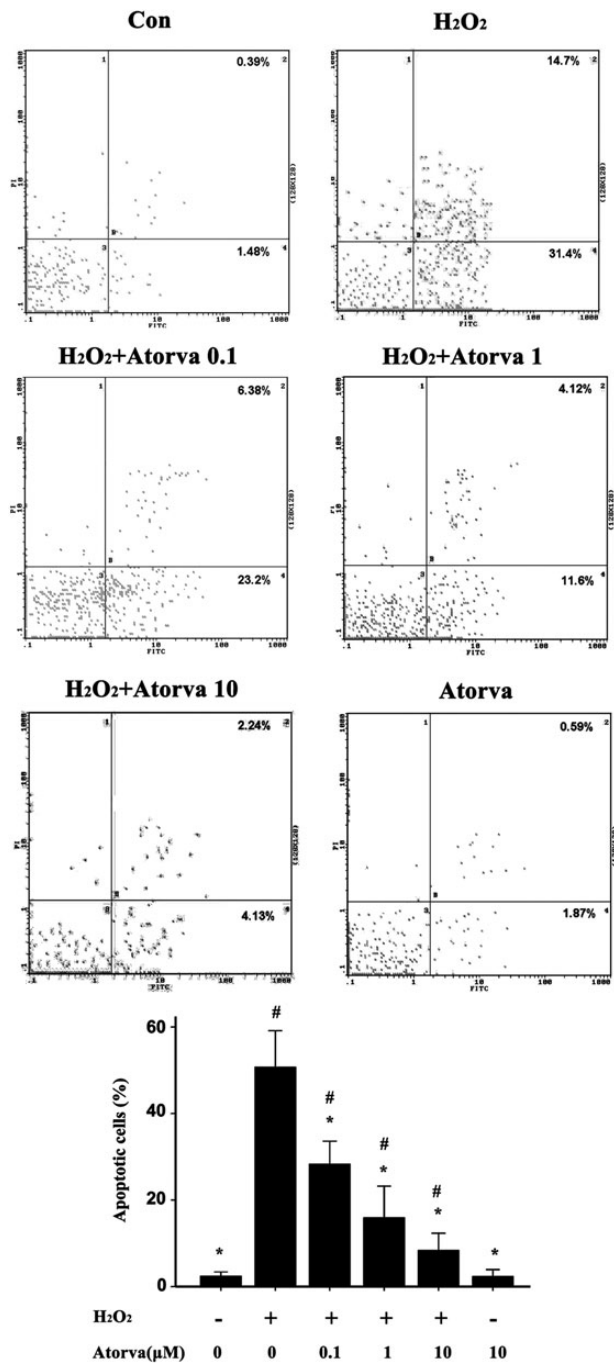

**Figure 3. Atorvastatin blocks H<sub>2</sub>O<sub>2</sub>-induced H9c2 cell apoptosis** Apoptotic cells detected by FITC-Annexin V/PI double staining flow cytometry. Region UR shows the late apoptotic cells (FITC<sup>+</sup>/PI<sup>+</sup>), region LL shows the viable cells (FITC<sup>-</sup>/PI<sup>-</sup>), and region LR shows the early apoptotic cells (FITC<sup>+</sup>/PI<sup>-</sup>). H<sub>2</sub>O<sub>2</sub> treatment significantly increased H9c2 cell apoptosis. In the presence of atorvastatin, apoptosis was significantly blocked in a dose-dependent manner. Con: vehicle-treated cells; H<sub>2</sub>O<sub>2</sub>: H<sub>2</sub>O<sub>2</sub> (600 μM) alone; H<sub>2</sub>O<sub>2</sub> + Atorva 0.1: H<sub>2</sub>O<sub>2</sub> + atorvastatin (0.1 μM); H<sub>2</sub>O<sub>2</sub> + Atorva 1: H<sub>2</sub>O<sub>2</sub> + atorvastatin (1 μM); H<sub>2</sub>O<sub>2</sub> + Atorva 10: H<sub>2</sub>O<sub>2</sub> + atorvastatin (10 μM); Atorva: atorvastatin (10 μM) alone. Data are presented as the mean ± SD of three independent experiments. #P < 0.01 compared with normal control; \*P < 0.01 compared with H<sub>2</sub>O<sub>2</sub> treatment alone.

oxidative stress [8]. It indicates the existence of a positive feedback loop between oxidative stress and LOX-1 expression. In this study, we showed that H<sub>2</sub>O<sub>2</sub> induces an increase in the number of apoptotic

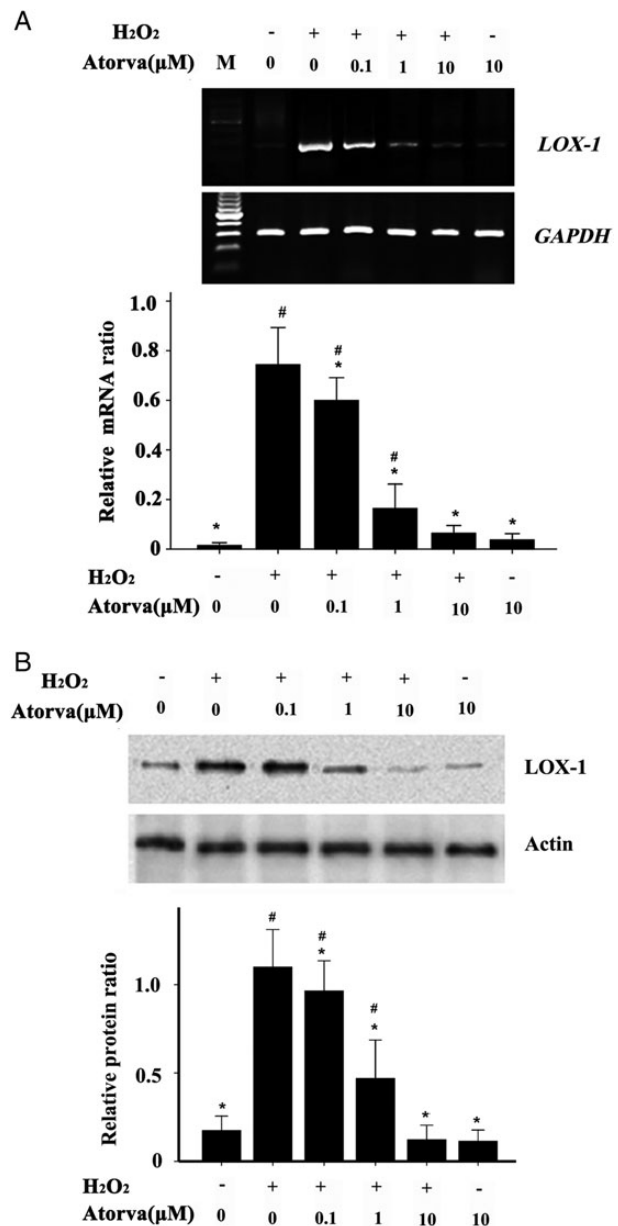

**Figure 4. Pretreatment of H9c2 cells with atorvastatin inhibits H<sub>2</sub>O<sub>2</sub>-induced LOX-1 expression in a dose-dependent manner** Data are presented as the mean ± SD of three independent experiments. #P < 0.01 compared with normal control; \*P < 0.01 compared with H<sub>2</sub>O<sub>2</sub> (600 μM) treatment alone. (A) mRNA level of LOX-1 in treated H9c2 cells was detected by quantitative RT-PCR. (B) Protein expression of LOX-1 in treated H9c2 cells was detected by western blot analysis.

cardiomyocytes and caspase protein expression, an increase in the expression levels of LOX-1 mRNA and protein, but a decrease in H9c2 cell viability. These results suggested that H<sub>2</sub>O<sub>2</sub> induces cardiac myocyte apoptosis through the activation of a LOX-1-dependent pathway.

Evidence obtained from clinical studies indicates that atorvastatin provides significant protection against major cardiovascular events in patients with ACS. The protective effects of statins in ACS may include prevention of endothelial dysfunction [24], enhanced plaque stability, anti-inflammatory effects, and correction of prothrombotic tendencies [25]. Statin therapy during the peri-infarct period significantly

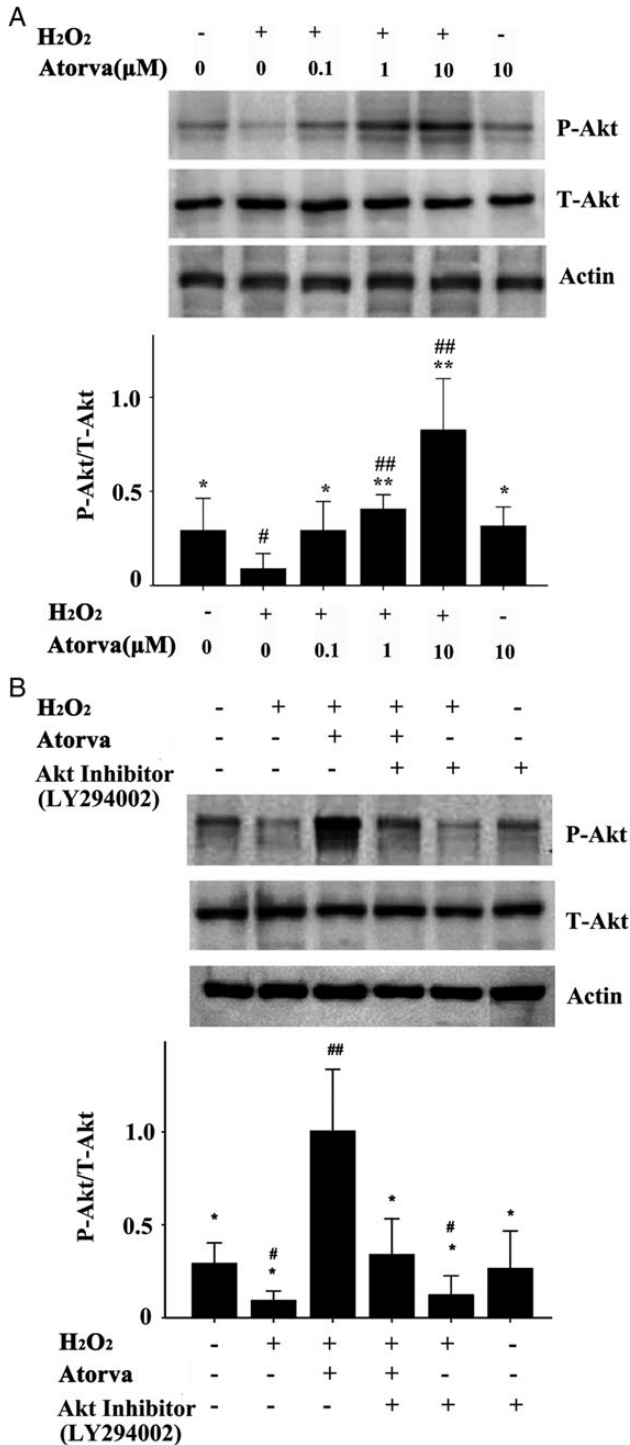

**Figure 5. Atorvastatin activates H<sub>2</sub>O<sub>2</sub>-suppressed phosphorylation of Akt in H9c2 cells** (A) Western blot analysis showed that atorvastatin activated H<sub>2</sub>O<sub>2</sub>-suppressed phosphorylation of Akt in a dose-dependent manner. Data are presented as the mean ± SD of three independent experiments. #*P*<0.05 and ##*P*<0.01 compared with normal control; \**P*<0.05 and \*\**P*<0.01 compared with H<sub>2</sub>O<sub>2</sub> treatment alone. (B) The atorvastatin induced phosphorylation of Akt was suppressed by the Akt inhibitor LY294002 in H<sub>2</sub>O<sub>2</sub>-treated H9c2 cells. #*P*<0.05 and ##*P*<0.01 compared with normal control; \**P*<0.01 compared with H<sub>2</sub>O<sub>2</sub> (600 μM) + atorvastatin (10 μM) treatment.

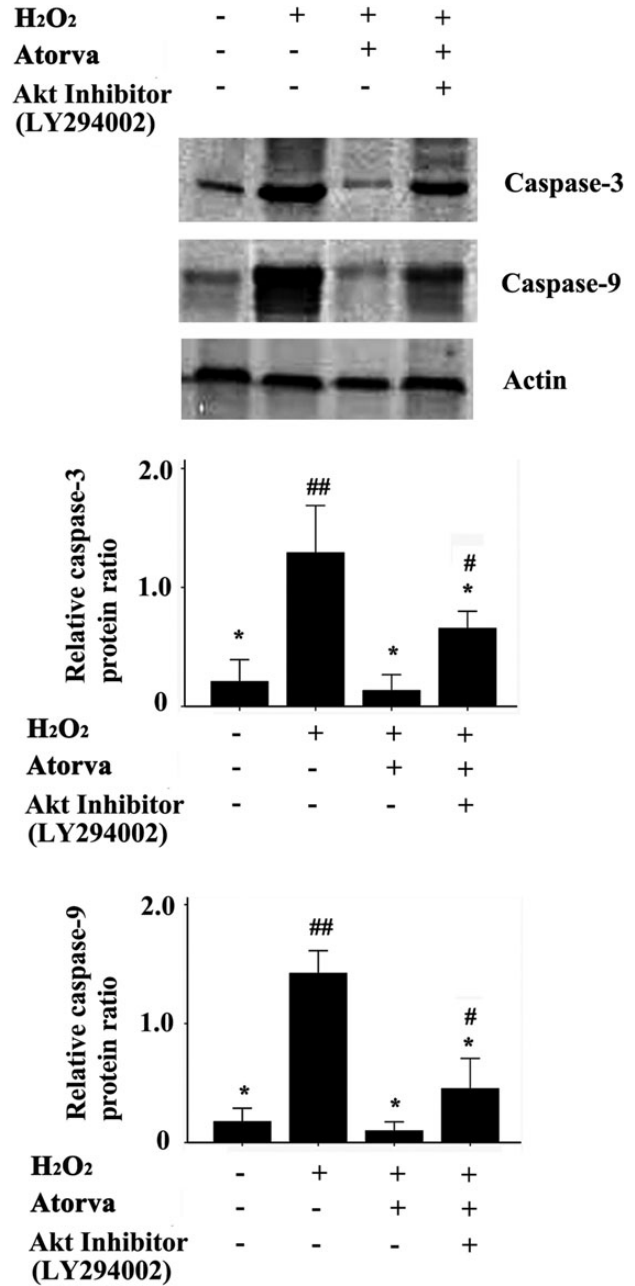

**Figure 6. Atorvastatin suppresses H<sub>2</sub>O<sub>2</sub>-induced caspase-3 and caspase-9 up-regulation through activating Akt signal pathway in H9c2 cells** Protein expression of caspase-3 and caspase-9 in treated H9c2 cells was detected by western blot analysis. Atorvastatin (10 μM) suppressed H<sub>2</sub>O<sub>2</sub> (600 μM)-induced caspase-3 and caspase-9 up-regulation. The Akt inhibitor, LY294002 (10 μM), inhibited the suppressive effects of atorvastatin. Data are presented as the mean ± SD of three independent experiments. #*P*<0.01 compared with normal control; \**P*<0.01 compared with H<sub>2</sub>O<sub>2</sub> treatment alone.

decreased myocardial apoptosis and improved left ventricular function in the experimental animal model of MI [26,27]. However, the molecular mechanism of atorvastatin in myocardial protection during ACS has not been fully clarified. In this study, H9c2 cardiomyocytes were used to investigate the protective effects of atorvastatin on H<sub>2</sub>O<sub>2</sub>-induced LOX-1 expression and cell apoptosis. To our knowledge, this

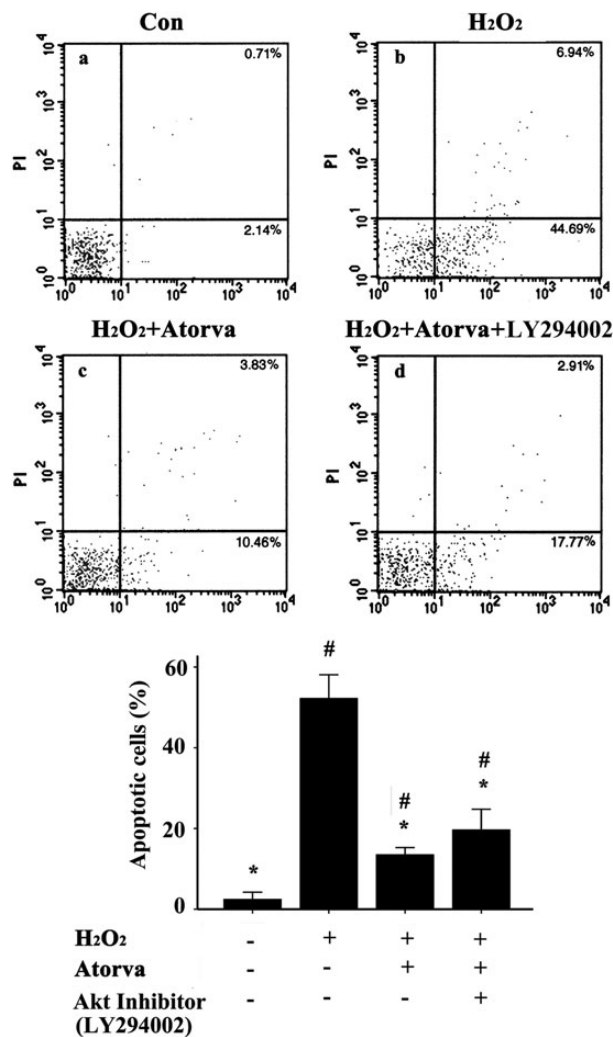

**Figure 7. Atorvastatin suppresses H<sub>2</sub>O<sub>2</sub>-induced apoptosis through activating Akt signal pathway in H9c2 cells** Flow cytometry analysis showed that atorvastatin blocks H<sub>2</sub>O<sub>2</sub>-induced H9c2 cell apoptosis. The Akt inhibitor, LY294002, reduced the protective effect of atorvastatin against apoptosis. Con: vehicle-treated cells; H<sub>2</sub>O<sub>2</sub>: H<sub>2</sub>O<sub>2</sub> (600 μM) alone; H<sub>2</sub>O<sub>2</sub> + Atorva: H<sub>2</sub>O<sub>2</sub> + atorvastatin (10 μM); H<sub>2</sub>O<sub>2</sub> + Atorva + LY294002: H<sub>2</sub>O<sub>2</sub> + atorvastatin (10 μM) + LY294002 (10 μM).

study is the first report to demonstrate that atorvastatin attenuates H<sub>2</sub>O<sub>2</sub>-induced apoptosis of H9c2 cardiomyocytes via a LOX-1-dependent pathway in a concentration-dependent manner. It establishes a possible mechanistic basis for the beneficial effects of statins in ACS. Our results are supported by previous studies of statins demonstrating protection against atherosclerosis through the LOX-1 pathway in other cell lines. Ox-LDL uptake by ECs induces endothelial activation, dysfunction and loss of integrity, and alterations in cell secretory function. These changes in endothelial biology provide an early event in atherosclerosis [16]. Statins inhibit the expression of LOX-1 elicited by ox-LDL and, subsequently, attenuate the uptake of ox-LDL, decrease the expression of adhesion molecules [28], reverse the reduction in PKB activity [16], and modulate inflammatory activation [29] in ECs. Other studies have shown that statins down-regulated LOX-1 expression in macrophages [30], aortic SMCs [30], and platelets [31,32] to influence foam cell formation and platelet activation.

The Akt pathway plays key roles in the pathogenesis of various processes in the heart [13,14]. There is strong evidence in the literature

suggesting that short-term activation of Akt has beneficial effects via the inhibition of apoptotic cell death [14]. Moreover, Akt plays a modulatory role in LOX-1 synthesis. Blocking Akt phosphorylation increases LOX-1 expression and activation of LOX-1 attenuates Akt phosphorylation [15]. It is well known that statins can inhibit the synthesis of isoprenoid intermediates such as farnesyl pyrophosphate (FPP) and geranylgeranyl pyrophosphate (GGPP) downstream of the mevalonate pathway [33]. FPP and GGPP participate in protein prenylation, a posttranslational modification of many proteins, including small GTPases, such as Rho, Rac1, and Ras, which enables their correct localization and participation in signal transduction processes [33,34]. It was reported that Rho A can inhibit the PI3K/Akt pathway [35]. As statins can inhibit GTPases, they can also activate the PI3K/Akt pathway [36]. Consistent with this idea, our study encompassed the examination of Akt targets to explore the possible underlying mechanism of the attenuation of H<sub>2</sub>O<sub>2</sub>-induced apoptosis by atorvastatin. Our results showed that after 24 h treatment with H<sub>2</sub>O<sub>2</sub>, phosphorylation of Akt was inhibited in H9c2 cardiomyocytes, and atorvastatin inhibited this effect in a dose-dependent manner. The specific Akt inhibitor, LY294002, abolished the ability of atorvastatin to increase phosphorylation of Akt and protect H9c2 cardiomyocytes against H<sub>2</sub>O<sub>2</sub>-induced apoptosis. Caspase-3 and caspase-9 are important molecules in the apoptosis pathway, and their expressions are positively correlated with cell apoptosis. In the presence of LY294002, the suppressive effects of atorvastatin on H<sub>2</sub>O<sub>2</sub>-induced caspase up-regulation were significantly reversed. These results suggested that atorvastatin may prevent cardiovascular disease by attenuating cardiomyocyte LOX-1 expression and apoptosis via interference with Akt during oxidative stress. Data from an *in vivo* study demonstrated that activation of Akt reduced cardiomyocyte apoptosis, preserved cardiac function, and enhanced cardiac myocyte survival after myocardial ischemia-reperfusion injury [37]. Given that atorvastatin protects cardiomyocytes by interfering with Akt signaling during oxidative stress, further experiments are required to elucidate the complexity of the feedback regulatory pathways involved in this process.

In conclusion, this study demonstrates that atorvastatin protects cardiomyocytes from oxidative stress by inhibiting LOX-1 expression and cell apoptosis, and activation of H<sub>2</sub>O<sub>2</sub>-inhibited phosphorylation of Akt may play an important role in the protective effect of atorvastatin. Our results confirm and expand the body of evidence describing the cardioprotective advantage of statins in humans and animal models, and establish a possible mechanistic basis for the beneficial effects of statins in ACS.

## Supplementary Data

Supplementary data are available at *ABBS* online.

## Funding

This work was supported by a grant from the Science and Technology Department of Zhejiang Province, China (No. 2010C33036).

## References

- Misra MK, Sarwat M, Bhakuni P, Tuteja R, Tuteja N. Oxidative stress and ischemic myocardial syndromes. *Med Sci Monit* 2009, 15: RA209–RA219.
- Gill C, Mestral R, Samali A. Losing heart: the role of apoptosis in heart disease—a novel therapeutic target? *FASEB J* 2002, 16: 135–146.



3. Navarra T, Del Turco S, Berti S, Basta G. The lectin-like oxidized low-density lipoprotein receptor-1 and its soluble form: cardiovascular implications. *J Atheroscler Thromb* 2010, 17: 317–331.
4. Reiss AB, Anwar K, Wirkowski P. Lectin-like oxidized low density lipoprotein receptor 1 (LOX-1) in atherogenesis: a brief review. *Curr Med Chem* 2009, 16: 2641–2652.
5. Kuge Y, Kume N, Ishino S, Takai N, Ogawa Y, Mukai T, Minami M, et al. Prominent lectin-like oxidized low density lipoprotein (LDL) receptor-1 (LOX-1) expression in atherosclerotic lesions is associated with tissue factor expression and apoptosis in hypercholesterolemic rabbits. *Biol Pharm Bull* 2008, 31: 1475–1482.
6. Li D, Mehta JL. Upregulation of endothelial receptor for oxidized LDL (LOX-1) by oxidized LDL and implications in apoptosis of human coronary artery endothelial cells: evidence from use of antisense LOX-1 mRNA and chemical inhibitors. *Arterioscler Thromb Vasc Biol* 2000, 20: 1116–1122.
7. Ding Z, Wang X, Khaidakov M, Liu S, Mehta JL. MicroRNA hsa-let-7 g targets lectin-like oxidized low-density lipoprotein receptor-1 expression and inhibits apoptosis in human smooth muscle cells. *Exp Biol Med (Maywood)* 2012, 237: 1093–1100.
8. Iwai-Kanai E, Hasegawa K, Sawamura T, Fujita M, Yanazume T, Toyokuni S, Adachi S, et al. Activation of lectin-like oxidized low-density lipoprotein receptor-1 induces apoptosis in cultured neonatal rat cardiac myocytes. *Circulation* 2001, 104: 2948–2954.
9. Spallarossa P, Fabbi P, Manca V, Garibaldi S, Ghigliotti G, Barisione C, Altieri P, et al. Doxorubicin-induced expression of LOX-1 in H9c2 cardiac muscle cells and its role in apoptosis. *Biochem Biophys Res Commun* 2005, 335: 188–196.
10. Li D, Williams V, Liu L, Chen H, Sawamura T, Romeo F, Mehta JL. Expression of lectin-like oxidized low-density lipoprotein receptors during ischemia-reperfusion and its role in determination of apoptosis and left ventricular dysfunction. *J Am Coll Cardiol* 2003, 41: 1048–1055.
11. Hu C, Dandapat A, Chen J, Fujita Y, Inoue N, Kawase Y, Jishage K, et al. LOX-1 deletion alters signals of myocardial remodeling immediately after ischemia-reperfusion. *Cardiovas Res* 2007, 76: 292–302.
12. Liang D, Xiang L, Yang M, Zhang X, Guo B, Chen Y, Yang L, et al. ZnT7 can protect MC3T3-E1 cells from oxidative stress-induced apoptosis via PI3K/Akt and MAPK/ERK signaling pathways. *Cell Signal* 2013, 25: 1126–1135.
13. Ravingerova T, Barancik M, Strniskova M. Mitogen-activated protein kinases: a new therapeutic target in cardiac pathology. *Mol Cell Biochem* 2003, 247: 127–138.
14. Chaanine AH, Hajjar RJ. AKT signalling in the failing heart. *Eur J Heart Fail* 2011, 13: 825–829.
15. Lu J, Yang JH, Burns AR, Chen HH, Tang D, Walterscheid JP, Suzuki S, et al. Mediation of electronegative low-density lipoprotein signaling by LOX-1: a possible mechanism of endothelial apoptosis. *Circ Res* 2009, 104: 619–627.
16. Li DY, Chen HJ, Mehta JL. Statins inhibit oxidized-LDL-mediated LOX-1 expression, uptake of oxidized-LDL and reduction in PKB phosphorylation. *Cardiovasc Res* 2001, 52: 130–135.
17. Ma Y, Chen Z, Zou Y, Ge J. Atorvastatin represses the angiotensin 2-induced oxidative stress and inflammatory response in dendritic cells via the PI3K/Akt/Nrf 2 pathway. *Oxid Med Cell Longev* 2014, 2014: 148798.
18. Schwartz GG, Olsson AG, Ezekowitz MD, Ganz P, Oliver MF, Waters D, Zeiher A, et al. Effects of atorvastatin on early recurrent ischemic events in acute coronary syndromes: the MIRACL study: a randomized controlled trial. *JAMA* 2001, 285: 1711–1718.
19. Murphy SA, Cannon CP, Wiviott SD, McCabe CH, Braunwald E. Reduction in recurrent cardiovascular events with intensive lipid-lowering statin therapy compared with moderate lipid-lowering statin therapy after acute coronary syndromes from the PROVE IT-TIMI 22 (Pravastatin or Atorvastatin Evaluation and Infection Therapy-Thrombolysis In Myocardial Infarction 22) trial. *J Am Coll Cardiol* 2009, 54: 2358–2362.
20. Arca M, Gaspardone A. Atorvastatin efficacy in the primary and secondary prevention of cardiovascular events. *Drugs* 2007, 67(Suppl. 1): 29–42.
21. Morrissey RP, Diamond GA, Kaul S. Statins in acute coronary syndromes: do the guideline recommendations match the evidence? *J Am Coll Cardiol* 2009, 54: 1425–1433.
22. Li D, Mehta JL. Intracellular signaling of LOX-1 in endothelial cell apoptosis. *Circ Res* 2009, 104: 566–568.
23. Hescheler J, Meyer R, Plant S, Krautwurst D, Rosenthal W, Schultz G. Morphological, biochemical, and electrophysiological characterization of a clonal cell (H9c2) line from rat heart. *Circ Res* 1991, 69: 1476–1486.
24. Dupuis J, Tardif JC, Cernacek P, Theroux P. Cholesterol reduction rapidly improves endothelial function after acute coronary syndromes. The RECIFE (reduction of cholesterol in ischemia and function of the endothelium) trial. *Circulation* 1999, 99: 3227–3233.
25. Crisby M, Nordin-Fredriksson G, Shah PK, Yano J, Zhu J, Nilsson J. Pravastatin treatment increases collagen content and decreases lipid content, inflammation, metalloproteinases, and cell death in human carotid plaques: implications for plaque stabilization. *Circulation* 2001, 103: 926–933.
26. Tang XL, Sanganalmath SK, Sato H, Bi Q, Hunt G, Vincent RJ, Peng Y, et al. Atorvastatin therapy during the peri-infarct period attenuates left ventricular dysfunction and remodeling after myocardial infarction. *PLoS One* 2011, 6: e25320.
27. Song XJ, Yang CY, Liu B, Wei Q, Korkor MT, Liu JY, Yang P. Atorvastatin inhibits myocardial cell apoptosis in a rat model with post-myocardial infarction heart failure by downregulating ER stress response. *Int J Med Sci* 2011, 8: 564–572.
28. Li D, Chen H, Romeo F, Sawamura T, Saldeen T, Mehta JL. Statins modulate oxidized low-density lipoprotein-mediated adhesion molecule expression in human coronary artery endothelial cells: role of LOX-1. *J Pharmacol Exp Ther* 2002, 302: 601–605.
29. Dje N'Guessan P, Riediger F, Vardarova K, Scharf S, Eitel J, Opitz B, Slevogt H, et al. Statins control oxidized LDL-mediated histone modifications and gene expression in cultured human endothelial cells. *Arterioscler Thromb Vasc Biol* 2009, 29: 380–386.
30. Hofnagel O, Luechtenborg B, Eschert H, Weissen-Plenz G, Severs NJ, Robenek H. Pravastatin inhibits expression of lectin-like oxidized low-density lipoprotein receptor-1 (LOX-1) in Watanabe heritable hyperlipidemic rabbits: a new pleiotropic effect of statins. *Arterioscler Thromb Vasc Biol* 2006, 26: 604–610.
31. Puccetti L, Sawamura T, Pasqui AL, Pastorelli M, Auteri A, Bruni F. Atorvastatin reduces platelet-oxidized-LDL receptor expression in hypercholesterolaemic patients. *Eur J Clin Invest* 2005, 35: 47–51.
32. Marwali MR, Hu CP, Mohandas B, Dandapat A, Deonikar P, Chen J, Cawich I, et al. Modulation of ADP-induced platelet activation by aspirin and pravastatin: role of lectin-like oxidized low-density lipoprotein receptor-1, nitric oxide, oxidative stress, and inside-out integrin signaling. *J Pharmacol Exp Ther* 2007, 322: 1324–1332.
33. Mital S, Liao JK. Statins and the myocardium. *Semin Vasc Med* 2004, 4: 377–384.
34. Yoshida M, Shiojima I, Ikeda H, Komuro I. Chronic doxorubicin cardiotoxicity is mediated by oxidative DNA damage-ATM-p53-apoptosis pathway and attenuated by pitavastatin through the inhibition of Rac1 activity. *J Mol Cell Cardiol* 2009, 47: 698–705.
35. Merla R, Ye Y, Lin Y, Manickavasagam S, Huang MH, Perez-Polo RJ, Uretsky BF, et al. The central role of adenosine in statin-induced ERK1/2, Akt, and eNOS phosphorylation. *Am J Physiol Heart Circ Physiol* 2007, 293: H1918–H1928.
36. Wu X, Lin D, Li G, Zuo Z. Statin post-treatment provides protection against simulated ischemia in bovine pulmonary arterial endothelial cells. *Eur J Pharmacol* 2010, 636: 114–120.
37. Matsui T, Tao J, del Monte F, Lee KH, Li L, Picard M, Force TL, et al. Akt activation preserves cardiac function and prevents injury after transient cardiac ischemia *in vivo*. *Circulation* 2001, 104: 330–335.
